# Supplementary material
Source: PubMed Central journal article supplement (PMC4959490)
Supplement: AEM.02549-15_zam999117070so1.pdf [file AEM.02549-15_zam999117070so1.pdf]

Supplemental Table S1 Bacterial counts (log cfu/g) in the crop, gizzard, ileum and ceca of broiler chickens fed with wheat based feed (WBF), maize based feed (MBF), maize feed with 15% crimped kernel maize silage (CKMS-15), and maize feed with 30% crimped kernel maize silage (CKMS-30) at different ages

| Item                           | Diet             |                   |                   |                  | SE   | Day              |                   |                   |                   |                  |                  | SE   | P-value* |        |
|--------------------------------|------------------|-------------------|-------------------|------------------|------|------------------|-------------------|-------------------|-------------------|------------------|------------------|------|----------|--------|
|                                | WBF              | MBF               | CKMS-15           | CKMS-30          |      | 8                | 15                | 22                | 25                | 29               | 36               |      | Diet     | Day    |
| <i>Crop</i>                    |                  |                   |                   |                  |      |                  |                   |                   |                   |                  |                  |      |          |        |
| Coliform bacteria              | 5.2              | 5.0               | 5.1               | 5.0              | 0.32 | 5.4 <sup>a</sup> | 5.0 <sup>ab</sup> | 5.4 <sup>a</sup>  | 5.4 <sup>a</sup>  | 4.8 <sup>b</sup> | 4.6 <sup>b</sup> | 0.25 | 0.897    | 0.005  |
| Lactose negative bacteria      | 4.2              | 4.0               | 4.3               | 4.1              | 0.16 | 4.7 <sup>a</sup> | 4.1 <sup>ab</sup> | 4.4 <sup>ab</sup> | 4.3 <sup>ab</sup> | 3.7 <sup>b</sup> | 3.8 <sup>b</sup> | 0.26 | 0.376    | 0.006  |
| Lactic acid bacteria           | 9.0              | 8.9               | 9.0               | 8.8              | 0.09 | 8.9              | 9.0               | 8.9               | 8.9               | 8.9              | 8.8              | 0.11 | 0.228    | 0.795  |
| Total anaerobic bacteria       | 8.8              | 8.7               | 8.8               | 8.7              | 0.10 | 8.8              | 8.8               | 8.8               | 8.7               | 8.7              | 8.6              | 0.12 | 0.467    | 0.554  |
| <i>Gizzard</i>                 |                  |                   |                   |                  |      |                  |                   |                   |                   |                  |                  |      |          |        |
| Coliform bacteria              | 4.0              | 3.6               | 3.8               | 3.6              | 0.24 | 3.9              | 3.4               | 3.7               | 3.8               | 3.7              | 3.7              | 0.27 | 0.355    | 0.641  |
| Lactose negative bacteria      | 3.3              | 3.1               | 3.0               | 3.2              | 0.15 | 3.4              | 3.2               | 3.2               | 3.4               | 3.1              | 2.9              | 0.19 | 0.270    | 0.205  |
| Lactic acid bacteria           | 7.5 <sup>a</sup> | 7.0 <sup>b</sup>  | 7.2 <sup>ab</sup> | 7.1 <sup>b</sup> | 0.13 | 7.1              | 7.4               | 7.3               | 6.9               | 7.2              | 7.3              | 0.21 | 0.008    | 0.114  |
| Total anaerobic bacteria       | 7.4 <sup>a</sup> | 6.9 <sup>b</sup>  | 7.1 <sup>b</sup>  | 6.9 <sup>b</sup> | 0.04 | 7.0              | 7.3               | 7.2               | 6.7               | 7.1              | 7.3              | 0.24 | <0.001   | 0.164  |
| <i>Ileum</i>                   |                  |                   |                   |                  |      |                  |                   |                   |                   |                  |                  |      |          |        |
| Coliform bacteria              | 5.6              | 5.7               | 5.4               | 5.2              | 0.37 | 5.1              | 5.6               | 5.4               | 5.7               | 5.6              | 5.4              | 0.24 | 0.462    | 0.158  |
| Lactose negative bacteria      | 5.1 <sup>a</sup> | 4.8 <sup>a</sup>  | 4.6 <sup>a</sup>  | 4.4 <sup>b</sup> | 0.18 | 4.5 <sup>b</sup> | 5.4 <sup>a</sup>  | 4.7 <sup>b</sup>  | 4.6 <sup>b</sup>  | 4.7 <sup>b</sup> | 4.2 <sup>b</sup> | 0.22 | 0.014    | <0.001 |
| <i>Clostridium perfringens</i> | 3.3              | 3.1               | 3.4               | 2.6              | 0.72 | 3.1              | 3.5               | 3.3               | 3.6               | 2.7              | 2.4              | 0.45 | 0.731    | 0.089  |
| Lactic acid bacteria           | 8.6              | 8.5               | 8.6               | 8.5              | 0.08 | 8.6              | 8.6               | 8.6               | 8.5               | 8.6              | 8.5              | 0.11 | 0.505    | 0.840  |
| Total anaerobic bacteria       | 8.4              | 8.4               | 8.3               | 8.3              | 0.11 | 8.5              | 8.3               | 8.5               | 8.2               | 8.5              | 8.4              | 0.12 | 0.442    | 0.063  |
| <i>Ceca</i>                    |                  |                   |                   |                  |      |                  |                   |                   |                   |                  |                  |      |          |        |
| Coliform bacteria              | 8.1              | 8.1               | 8.1               | 7.9              | 0.15 | 8.8 <sup>a</sup> | 7.9 <sup>bc</sup> | 7.8 <sup>bc</sup> | 8.1 <sup>b</sup>  | 8.0 <sup>b</sup> | 7.7 <sup>c</sup> | 0.11 | 0.625    | <0.001 |
| Lactose negative bacteria      | 6.9 <sup>a</sup> | 6.8 <sup>ab</sup> | 6.8 <sup>ab</sup> | 6.5 <sup>b</sup> | 0.10 | 8.2 <sup>a</sup> | 7.1 <sup>b</sup>  | 6.3 <sup>c</sup>  | 6.5 <sup>c</sup>  | 6.4 <sup>c</sup> | 5.9 <sup>d</sup> | 0.16 | 0.046    | <0.001 |
| <i>Clostridium perfringens</i> | 3.4              | 3.2               | 3.8               | 2.9              | 0.59 | 3.5              | 3.5               | 3.6               | 3.7               | 2.9              | 2.8              | 0.47 | 0.542    | 0.301  |
| Lactic acid bacteria           | 9.1              | 9.0               | 9.0               | 8.9              | 0.09 | 9.4 <sup>a</sup> | 9.3 <sup>a</sup>  | 8.8 <sup>b</sup>  | 9.0 <sup>b</sup>  | 8.8 <sup>b</sup> | 8.8 <sup>b</sup> | 0.10 | 0.219    | <0.001 |
| Total anaerobic bacteria       | 9.8              | 10.0              | 9.7               | 9.9              | 0.15 | 10.1             | 9.9               | 9.6               | 9.8               | 9.9              | 9.7              | 0.18 | 0.333    | 0.183  |

<sup>a-d</sup> LSM means within the same row with different superscripts differ significantly ( $P \leq 0.05$ )

\*No significant interaction between day and diet was observed

Supplemental Table S2 pH, and concentrations (mmol/kg) of SCFA<sup>1</sup> and lactic acid in the contents of crop, gizzard, ileum and ceca of broilers fed with whole wheat based feed (WBF), maize based feed (MBF), maize feed with 15% crimped kernel maize silage (CKMS-15), and maize feed with 30% crimped kernel maize silage (CKMS-30) at different ages

| Item           | Diet              |                  |                   |                   |      | Day               |                   |                   |                   |                   |                   | P-value* |        |        |
|----------------|-------------------|------------------|-------------------|-------------------|------|-------------------|-------------------|-------------------|-------------------|-------------------|-------------------|----------|--------|--------|
|                | WBF               | MBF              | CKMS-15           | CKMS-30           | SE   | 8                 | 15                | 22                | 25                | 29                | 36                | SE       | Diet   | Day    |
| <i>Crop</i>    |                   |                  |                   |                   |      |                   |                   |                   |                   |                   |                   |          |        |        |
| pH             | 5.0               | 5.2              | 5.0               | 4.9               | 0.08 | 5.1               | 4.9               | 5.0               | 5.1               | 5.1               | 4.9               | 0.11     | 0.080  | 0.136  |
| Acetate        | 9.3 <sup>ab</sup> | 7.9 <sup>b</sup> | 10.4 <sup>a</sup> | 11.1 <sup>a</sup> | 1.14 | 9.9 <sup>ab</sup> | 13.1 <sup>a</sup> | 8.9 <sup>b</sup>  | 8.9 <sup>b</sup>  | 8.9 <sup>b</sup>  | 8.3 <sup>b</sup>  | 1.55     | 0.064  | 0.031  |
| Propionate     | 0.2 <sup>c</sup>  | 0.3 <sup>c</sup> | 0.8 <sup>b</sup>  | 1.7 <sup>a</sup>  | 0.15 | ND                | 0.5               | 0.5               | 0.8               | 1.3               | 1.3               | -        | <0.001 | -      |
| Butyrate       | 0.1               | 0.1              | 0.3               | 0.1               | 0.11 | ND                | 0.3               | 0.4               | 0.1               | 0.1               | 0.1               | -        | 0.512  | -      |
| Isovalerate    | 0.2               | 0.3              | 0.3               | 0.2               | 0.11 | 0.7 <sup>a</sup>  | 0.3 <sup>b</sup>  | 0.1 <sup>b</sup>  | 0.2 <sup>b</sup>  | 0.1 <sup>b</sup>  | 0.1 <sup>b</sup>  | 0.13     | 0.714  | <0.001 |
| Lactate        | 48.8              | 36.1             | 45.7              | 49.6              | 6.01 | 46.3              | 45.0              | 47.3              | 44.4              | 42.2              | 45.1              | 8.01     | 0.171  | 0.995  |
| Succinate      | 2.9               | 2.0              | 2.3               | 1.8               | 0.56 | 2.5 <sup>ab</sup> | 3.6 <sup>a</sup>  | 1.9 <sup>b</sup>  | 1.2 <sup>b</sup>  | 1.8 <sup>b</sup>  | 2.5 <sup>ab</sup> | 0.66     | 0.296  | 0.019  |
| <i>Gizzard</i> |                   |                  |                   |                   |      |                   |                   |                   |                   |                   |                   |          |        |        |
| pH             | 3.0               | 3.1              | 2.9               | 2.9               | 0.21 | 2.6 <sup>b</sup>  | 2.8 <sup>ab</sup> | 2.9 <sup>ab</sup> | 3.1 <sup>ab</sup> | 3.2 <sup>a</sup>  | 3.2 <sup>a</sup>  | 0.19     | 0.758  | 0.009  |
| Acetate        | 2.3               | 2.7              | 2.7               | 2.6               | 0.65 | 2.5               | 2.2               | 2.2               | 2.2               | 2.9               | 3.2               | 0.85     | 0.895  | 0.738  |
| Propionate     | 0.2               | 0.4              | 0.3               | 0.4               | 0.19 | 0.1               | ND                | ND                | 0.1               | 0.6               | 1.1               | -        | 0.637  | -      |
| Butyrate       | 0.10              | 0.40             | 0.33              | 0.66              | 0.27 | 0.3 <sup>ab</sup> | 0.9 <sup>a</sup>  | 0.5 <sup>ab</sup> | 0.5 <sup>ab</sup> | 0.1 <sup>b</sup>  | 0.1 <sup>b</sup>  | 0.26     | 0.283  | 0.017  |
| Lactic acid    | 7.1               | 4.1              | 5.6               | 6.9               | 1.62 | 4.7               | 6.6               | 8.2               | 4.6               | 6.4               | 5.1               | 2.12     | 0.271  | 0.488  |
| Succinate      | 0.2               | 0.3              | 0.1               | 0.1               | 0.14 | 0.27              | ND                | ND                | ND                | 0.1               | 0.7               | -        | 0.806  | -      |
| <i>Ileum</i>   |                   |                  |                   |                   |      |                   |                   |                   |                   |                   |                   |          |        |        |
| pH             | 6.7               | 6.7              | 6.7               | 6.8               | 0.10 | 7.1 <sup>a</sup>  | 6.5 <sup>b</sup>  | 6.4 <sup>b</sup>  | 6.7 <sup>b</sup>  | 6.8 <sup>ab</sup> | 6.8 <sup>ab</sup> | 0.12     | 0.916  | <0.001 |
| Acetate        | 7.1 <sup>b</sup>  | 8.9 <sup>a</sup> | 8.8 <sup>a</sup>  | 7.6 <sup>ab</sup> | 0.69 | 7.2 <sup>b</sup>  | 5.9 <sup>c</sup>  | 7.5 <sup>b</sup>  | 7.9 <sup>b</sup>  | 9.3 <sup>ab</sup> | 10.8 <sup>a</sup> | 0.84     | 0.044  | <0.001 |
| Propionate     | 0.2               | 0.2              | 0.2               | 0.3               | 0.09 | ND                | ND                | ND                | ND                | 0.6 <sup>a</sup>  | 0.7 <sup>b</sup>  | -        | 0.917  | -      |
| Butyrate       | 0.1               | 0.1              | 0.1               | 0.1               | 0.08 | ND                | 0.1               | 0.1               | 0.0               | ND                | 0.1               | -        | 0.925  | -      |
| Lactate        | 29.7              | 26.6             | 32.9              | 29.7              | 5.14 | 24.5              | 26.1              | 33.9              | 28.9              | 32.3              | 32.5              | 5.81     | 0.688  | 0.530  |
| Succinate      | 0.2               | 0.1              | 0.2               | 0.2               | 0.16 | ND                | ND                | ND                | ND                | 0.1 <sup>b</sup>  | 1.1 <sup>a</sup>  | -        | 0.872  | -      |

| <i>Ceca</i> |                  |                  |                  |                   |      |                   |                   |                   |                    |                   |                    |      |        |        |
|-------------|------------------|------------------|------------------|-------------------|------|-------------------|-------------------|-------------------|--------------------|-------------------|--------------------|------|--------|--------|
| pH          | 6.1 <sup>b</sup> | 6.4 <sup>a</sup> | 6.5 <sup>a</sup> | 6.3 <sup>ab</sup> | 0.08 | 6.0 <sup>b</sup>  | 6.4 <sup>a</sup>  | 6.2 <sup>ab</sup> | 6.3 <sup>a</sup>   | 6.4 <sup>a</sup>  | 6.3 <sup>a</sup>   | 0.10 | <0.001 | <0.001 |
| Acetate     | 76.8             | 77.4             | 78.2             | 74.5              | 5.08 | 79.3              | 68.7              | 81.1              | 79.1               | 80.1              | 71.9 <sup>b</sup>  | 5.15 | 0.896  | 0.078  |
| Propionate  | 4.9              | 5.2              | 5.3              | 4.6               | 0.36 | 0.9 <sup>c</sup>  | 3.2 <sup>b</sup>  | 6.0 <sup>a</sup>  | 6.3 <sup>a</sup>   | 7.3 <sup>a</sup>  | 6.3 <sup>a</sup>   | 0.72 | 0.305  | <0.001 |
| Butyrate    | 17.3             | 15.1             | 15.6             | 13.8              | 1.43 | 8.6 <sup>c</sup>  | 12.9 <sup>b</sup> | 19.1 <sup>a</sup> | 17.4 <sup>ab</sup> | 18.1 <sup>a</sup> | 16.4 <sup>ab</sup> | 1.62 | 0.128  | <0.001 |
| Isovalerate | 0.2              | 0.3              | 0.3              | 0.2               | 0.09 | ND                | 0.1               | 0.3               | 0.3                | 0.3               | 0.3                | 0.01 | 0.691  | -      |
| Lactate     | 8.2              | 7.1              | 3.1              | 7.6               | 2.47 | 26.4 <sup>a</sup> | 1.3 <sup>b</sup>  | 1.8 <sup>b</sup>  | 3.4 <sup>b</sup>   | 4.6 <sup>b</sup>  | 1.3 <sup>b</sup>   | 2.78 | 0.216  | <0.001 |
| Succinate   | 10.8             | 8.6              | 6.2              | 11.9              | 2.09 | 25.7 <sup>a</sup> | 7.8 <sup>b</sup>  | 6.9 <sup>b</sup>  | 5.4 <sup>b</sup>   | 5.7 <sup>b</sup>  | 4.7 <sup>b</sup>   | 2.64 | 0.078  | <0.001 |

<sup>1</sup>SCFA= short chain fatty acids

<sup>a-c</sup> LSM means within the same row with different superscripts differ significantly ( $P \leq 0.05$ )

ND = Not detectable

\*No significant interaction between day and diet was observed

Supplemental Table S3 Alpha diversity indices\* (700 rarefaction depths) at day 8, 15, 22, 25, 29 and 36

| Indices          | Day               |                   |                   |                   |                   |                   | SE   | P-value |
|------------------|-------------------|-------------------|-------------------|-------------------|-------------------|-------------------|------|---------|
|                  | 8                 | 15                | 22                | 25                | 29                | 36                |      |         |
| PD whole tree    | 2.5 <sup>c</sup>  | 2.5 <sup>c</sup>  | 3.4 <sup>a</sup>  | 3.5 <sup>a</sup>  | 3.0 <sup>b</sup>  | 3.5 <sup>a</sup>  | 0.07 | <0.001  |
| Chao1            | 50.1 <sup>b</sup> | 46.9 <sup>b</sup> | 69.4 <sup>a</sup> | 73.5 <sup>a</sup> | 51.1 <sup>b</sup> | 75.4 <sup>a</sup> | 1.74 | <0.001  |
| Observed species | 32.3 <sup>b</sup> | 34.2 <sup>b</sup> | 45.3 <sup>a</sup> | 46.9 <sup>a</sup> | 36.5 <sup>b</sup> | 46.1 <sup>a</sup> | 1.39 | <0.001  |
| Shannon          | 2.8 <sup>c</sup>  | 3.1 <sup>b</sup>  | 3.2 <sup>a</sup>  | 3.2 <sup>a</sup>  | 2.5 <sup>d</sup>  | 3.2 <sup>a</sup>  | 0.01 | <0.001  |

<sup>a-d</sup> LSM means within the same row with different superscripts differ significantly ( $P \leq 0.05$ )

\*Pooled data of two treatments (MBF and CKMS-30) and four intestinal segments (crop, gizzard, ileum and ceca).

Supplemental Table S4 Relative abundance of bacteria in the upper digestive tract (crop and gizzard) of broilers at different ages

| Item                    | Day                |                   |                    |                    |                    |                   | SE   | P-value |
|-------------------------|--------------------|-------------------|--------------------|--------------------|--------------------|-------------------|------|---------|
|                         | 8                  | 15                | 22                 | 25                 | 29                 | 36                |      |         |
| <i>Crop</i>             |                    |                   |                    |                    |                    |                   |      |         |
| <b>Firmicutes</b>       | 97.4               | 97.8              | 98.3               | 98.3               | 98.4               | 97.4              | 0.91 | 0.751   |
| Lactobacillaceae*       | 97.4               | 96.7              | 96.1               | 97.6               | 96.4               | 94.2              | 1.76 | 0.434   |
| Lactobacillus           | 97.4               | 96.7              | 96.1               | 97.6               | 96.3               | 94.2              | 1.77 | 0.439   |
| Planococcaceae          | ND                 | 1.0               | 2.2                | 0.6                | 1.8                | 1.7               | 0.80 | -       |
| Staphylococcaceae*      |                    |                   |                    |                    |                    |                   |      |         |
| Staphylococcus          | ND                 | ND                | 0.1                | 0.02               | 0.1                | 1.1               | 0.36 | -       |
| <b>Actinobacteria</b> * |                    |                   |                    |                    |                    |                   |      |         |
| Corynebacteriaceae      |                    |                   |                    |                    |                    |                   |      |         |
| Corynebacterium         | ND                 | ND                | 0.03               | 0.02               | 0.2                | 0.9               | 0.25 | -       |
| <i>Gizzard</i>          |                    |                   |                    |                    |                    |                   |      |         |
| <b>Firmicutes</b>       | 88.9 <sup>ab</sup> | 98.1 <sup>a</sup> | 91.1 <sup>ab</sup> | 90.0 <sup>ab</sup> | 88.9 <sup>ab</sup> | 86.9 <sup>b</sup> | 3.31 | 0.031   |
| Lactobacillaceae*       |                    |                   |                    |                    |                    |                   |      |         |
| Lactobacillus           | 64.2 <sup>ab</sup> | 86.5 <sup>a</sup> | 63.8 <sup>ab</sup> | 62.3 <sup>ab</sup> | 60.9 <sup>b</sup>  | 58.4 <sup>b</sup> | 8.48 | 0.026   |
| Lachnospiraceae         | 10.3 <sup>a</sup>  | 2.7 <sup>b</sup>  | 5.5 <sup>ab</sup>  | 4.8 <sup>ab</sup>  | 4.3 <sup>ab</sup>  | 2.3 <sup>b</sup>  | 2.57 | 0.047   |
| Roseburia               | 6.3 <sup>a</sup>   | 1.2 <sup>b</sup>  | 2.1 <sup>ab</sup>  | 1.6 <sup>b</sup>   | 1.2 <sup>b</sup>   | 1.1 <sup>b</sup>  | 1.51 | 0.010   |
| Blautia                 | 1.7                | 0.2               | 0.6                | 0.6                | 0.1                | 0.2               | 0.62 | 0.132   |
| Fusicatenibacter        | 1.1                | 0.4               | 1.1                | 0.8                | 1.3                | 0.3               | 0.45 | 0.164   |
| Ruminococcaceae         | 9.3                | 3.8               | 6.2                | 8.8                | 8.7                | 4.7               | 2.77 | 0.238   |
| Ruminococcus            | 7.4                | 2.8               | 4.0                | 4.6                | 4.9                | 2.1               | 2.00 | 0.153   |
| Faecalibacterium        | 0.3 <sup>b</sup>   | 0.2 <sup>b</sup>  | 0.7 <sup>b</sup>   | 2.7 <sup>a</sup>   | 1.5 <sup>ab</sup>  | 1.7 <sup>ab</sup> | 0.69 | 0.006   |
| Enterococcaceae*        |                    |                   |                    |                    |                    |                   |      |         |
| Enterococcus            | 2.8                | 0.1               | 1.3                | 1.3                | 0.8                | 1.2               | 1.02 | 0.234   |
| Clostridiaceae          | 0.6                | 1.3               | 1.3                | 1.4                | 2.5                | 3.3               | 0.97 | 0.115   |
| Clostridium             | 0.4 <sup>b</sup>   | 1.3 <sup>ab</sup> | 0.7 <sup>ab</sup>  | 0.9 <sup>ab</sup>  | 2.3 <sup>ab</sup>  | 3.2 <sup>a</sup>  | 0.97 | 0.044   |
| Planococcaceae          | 0.01 <sup>b</sup>  | 3.4 <sup>ab</sup> | 11.4 <sup>a</sup>  | 9.3 <sup>ab</sup>  | 9.5 <sup>ab</sup>  | 9.5 <sup>ab</sup> | 3.65 | 0.025   |
| Staphylococcaceae*      |                    |                   |                    |                    |                    |                   |      |         |
| Staphylococcus          | ND                 | ND                | 0.2                | 0.4                | 0.8                | 4.8               | -    | -       |
| <b>Proteobacteria</b>   | 10.6 <sup>a</sup>  | 1.4 <sup>b</sup>  | 5.7 <sup>ab</sup>  | 4.8 <sup>ab</sup>  | 3.4 <sup>b</sup>   | 2.4 <sup>b</sup>  | 2.16 | 0.002   |
| Comamonadaceae          | 2.8 <sup>a</sup>   | 0.4 <sup>b</sup>  | 2.0 <sup>ab</sup>  | 0.9 <sup>ab</sup>  | 0.5 <sup>ab</sup>  | 0.6 <sup>ab</sup> | 0.81 | 0.026   |
| Moraxellaceae*          |                    |                   |                    |                    |                    |                   |      |         |
| Acenetobacter           | 1.9                | 0.2               | 0.9                | 1.4                | 1.0                | 5.0               | 0.57 | 0.068   |
| Enterobacteriaceae      | 1.7                | 0.1               | 0.3                | 0.8                | 0.3                | 0.4               | 0.59 | 0.098   |
| Escherichia             | 1.2                | 0.1               | 0.3                | 0.8                | 0.1                | 0.3               | 0.53 | 0.229   |
| Sphingomonadaceae       | 1.6                | 0.1               | 1.6                | 1.0                | 0.5                | 0.4               | 0.59 | 0.064   |
| Sphingomonas            | 0.9                | 0.1               | 1.2                | 0.4                | 0.2                | 0.1               | 0.47 | 0.119   |

|                       |                  |                   |                   |                   |                   |                   |      |        |
|-----------------------|------------------|-------------------|-------------------|-------------------|-------------------|-------------------|------|--------|
| <b>Bacteroidetes</b>  | 0.2 <sup>b</sup> | 0.4 <sup>ab</sup> | 1.3 <sup>ab</sup> | 2.4 <sup>ab</sup> | 3.2 <sup>a</sup>  | 0.8 <sup>ab</sup> | 1.01 | 0.031  |
| Rikenellaceae*        |                  |                   |                   |                   |                   |                   |      |        |
| Alistipes             | 0.1              | 0.2               | 1.2               | 2.2               | 2.8               | 0.4               | 0.99 | 0.061  |
| <b>Actinobacteria</b> | 0.2 <sup>b</sup> | 0.1 <sup>b</sup>  | 1.4 <sup>b</sup>  | 1.3 <sup>b</sup>  | 2.9 <sup>b</sup>  | 9.5 <sup>a</sup>  | 1.95 | <0.001 |
| Corynebacteriaceae*   |                  |                   |                   |                   |                   |                   |      |        |
| Corynebacterium       | ND               | ND                | 0.6               | 0.8               | 0.5               | 3.7               | -    | -      |
| Dermabacteraceae*     |                  |                   |                   |                   |                   |                   |      |        |
| Brachybacterium       | ND               | ND                | 0.6               | 0.3               | 1.8               | 2.5               | -    | -      |
| Brevibacteriaceae*    |                  |                   |                   |                   |                   |                   |      |        |
| Brevibacterium        | ND               | ND                | 0.1               | 0.1               | 0.6               | 2.9               | -    | -      |
| <b>Tenericutes</b>    | 0.1 <sup>b</sup> | 0.1 <sup>b</sup>  | 0.4 <sup>ab</sup> | 1.3 <sup>a</sup>  | 1.1 <sup>ab</sup> | 0.3 <sup>ab</sup> | 0.39 | 0.008  |

<sup>1</sup> Bacteria with a relative abundance of more than 1% in one the six sampling days are presented in the table

\*99-100% sequences belong to their corresponding genus

<sup>a-c</sup>LSMeans within the same row with different superscripts differ significantly ( $P \leq 0.05$ )

ND = not detectable

Supplemental Table S5 Relative abundance<sup>1</sup> of bacteria present in ileal content of broiler at different ages

| Item                   | Day               |                  |                  |                  |                  |                  | SE    | P-value |
|------------------------|-------------------|------------------|------------------|------------------|------------------|------------------|-------|---------|
|                        | 8                 | 15               | 22               | 25               | 29               | 36               |       |         |
| <b>Firmicutes</b>      | 97.7              | 93.8             | 97.4             | 97.1             | 96.4             | 97.2             | 2.58  | 0.675   |
| Lactobacillaceae*      |                   |                  |                  |                  |                  |                  |       |         |
| <i>Lactobacillus</i>   | 61.3              | 65.9             | 72.6             | 73.3             | 67.3             | 67.7             | 10.54 | 0.874   |
| Enterococcaceae*       |                   |                  |                  |                  |                  |                  |       |         |
| <i>Enterococcus</i>    | 25.3 <sup>a</sup> | 0.6 <sup>b</sup> | 2.2 <sup>b</sup> | 2.4 <sup>b</sup> | 1.8 <sup>b</sup> | 0.9 <sup>b</sup> | 4.04  | <0.001  |
| Lachnospiraceae        | 6.1               | 11.3             | 3.5              | 1.4              | 1.6              | 2.3              | 4.48  | 0.235   |
| <i>Roseburia</i>       | 1.7               | 1.8              | 0.8              | 0.2              | 0.1              | 0.5              | 0.92  | 0.307   |
| Clostridiaceae         | 4.7               | 16.7             | 11.7             | 12.0             | 18.4             | 19.3             | 6.03  | 0.171   |
| <i>Clostridium</i>     | 1.5               | 11.6             | 7.9              | 10.8             | 15.5             | 18.1             | 5.54  | 0.074   |
| Ruminococcaceae        | 2.0               | 3.1              | 1.7              | 1.3              | 2.4              | 1.3              | 1.37  | 0.753   |
| <i>Ruminococcus</i>    | 1.5               | 1.8              | 0.9              | 0.5              | 1.2              | 0.5              | 0.80  | 0.501   |
| Streptococcaceae*      |                   |                  |                  |                  |                  |                  |       |         |
| <i>Streptococcus</i>   | 1.2               | 0.1              | 0.7              | 1.7              | 2.5              | 4.7              | 1.82  | 0.176   |
| Planococcaceae         | 0.0               | 1.5              | 6.2              | 5.1              | 3.2              | 1.5              | 2.13  | 0.063   |
| <b>Proteobacteria</b>  | 2.2               | 5.4              | 0.6              | 1.0              | 1.0              | 0.6              | 2.23  | 0.251   |
| Enterobacteriaceae*    |                   |                  |                  |                  |                  |                  |       |         |
| <i>Escherichia</i>     | 0.4               | 1.6              | 1.7              | 0.5              | 0.6              | 0.2              | 0.75  | 0.435   |
| <b>Actinobacteria</b>  | 0.1               | 0.02             | 1.4              | 1.1              | 1.1              | 1.7              | 0.86  | 0.268   |
| Corynebacteriaceae*    |                   |                  |                  |                  |                  |                  |       |         |
| <i>Corynebacterium</i> | ND                | 0.01             | 0.8              | 0.9              | 0.8              | 1.1              | -     | -       |

<sup>1</sup>Bacteria with a relative abundance of more than 1% in one the six sampling days are only presented in the table

\*99-100% sequences belong to their corresponding genus

<sup>a-c</sup>LSMeans within the same row with different superscripts differ significantly ( $P \leq 0.05$ )

ND = not detectable

Supplemental Table S6 Relative abundance<sup>1</sup> of bacteria present in the ceca of broiler at different ages

| Item                    | Day                |                    |                    |                    |                   |                    | SE   | P-value |
|-------------------------|--------------------|--------------------|--------------------|--------------------|-------------------|--------------------|------|---------|
|                         | 8                  | 15                 | 22                 | 25                 | 29                | 36                 |      |         |
| <b>Firmicutes</b>       | 93.4 <sup>a</sup>  | 96.3 <sup>a</sup>  | 71.6 <sup>b</sup>  | 70.1 <sup>b</sup>  | 57.5 <sup>c</sup> | 75.4 <sup>b</sup>  | 5.14 | <0.001  |
| Lachnospiraceae         | 39.1 <sup>a</sup>  | 35.0 <sup>ab</sup> | 27.3 <sup>b</sup>  | 20.1 <sup>b</sup>  | 19.5 <sup>b</sup> | 22.7 <sup>b</sup>  | 3.03 | <0.001  |
| <i>Roseburia</i>        | 19.7 <sup>a</sup>  | 9.8 <sup>b</sup>   | 7.9 <sup>bc</sup>  | 5.7 <sup>bc</sup>  | 4.7 <sup>c</sup>  | 8.6 <sup>bc</sup>  | 1.76 | <0.001  |
| <i>Blautia</i>          | 9.8 <sup>a</sup>   | 3.9 <sup>b</sup>   | 2.4 <sup>bc</sup>  | 1.5 <sup>bc</sup>  | 1.0 <sup>c</sup>  | 1.6 <sup>bc</sup>  | 0.93 | <0.001  |
| <i>Fusicatenibacter</i> | 4.8                | 8.1                | 8.7                | 5.34               | 4.8               | 4.1                | 1.93 | 0.108   |
| <i>Coprococcus</i>      | 1.6 <sup>a</sup>   | 1.7 <sup>a</sup>   | 0.7 <sup>ab</sup>  | 0.6 <sup>b</sup>   | 0.56 <sup>b</sup> | 1.0 <sup>ab</sup>  | 0.33 | 0.004   |
| Ruminococcaceae         | 29.5 <sup>ab</sup> | 43.9 <sup>a</sup>  | 32.5 <sup>ab</sup> | 37.6 <sup>ab</sup> | 28.4 <sup>b</sup> | 36.1 <sup>ab</sup> | 4.92 | 0.046   |
| <i>Ruminococcus</i>     | 19.8               | 23.1               | 19.0               | 16.9               | 15.8              | 16.2               | 3.23 | 0.225   |
| <i>Oscillospira</i>     | 5.9 <sup>b</sup>   | 9.9 <sup>a</sup>   | 4.5 <sup>b</sup>   | 5.5 <sup>b</sup>   | 4.4 <sup>b</sup>  | 5.9 <sup>b</sup>   | 1.19 | <0.001  |
| <i>Butyricicoccus</i>   | 2.0 <sup>a</sup>   | 1.6 <sup>ab</sup>  | 0.6 <sup>b</sup>   | 1.1 <sup>ab</sup>  | 0.5 <sup>b</sup>  | 1.1 <sup>ab</sup>  | 0.39 | 0.002   |
| <i>Faecalibacterium</i> | 0.4 <sup>c</sup>   | 4.2 <sup>ab</sup>  | 3.4 <sup>b</sup>   | 8.9 <sup>a</sup>   | 3.2 <sup>b</sup>  | 7.9 <sup>ab</sup>  | 1.81 | <0.001  |
| <i>Ethanoligenes</i>    | 0.7 <sup>b</sup>   | 2.3 <sup>a</sup>   | 1.3 <sup>ab</sup>  | 0.9 <sup>b</sup>   | 0.9 <sup>b</sup>  | 0.9 <sup>b</sup>   | 0.44 | 0.013   |
| Lactobacillaceae *      |                    |                    |                    |                    |                   |                    |      |         |
| <i>Lactobacillus</i>    | 17.5 <sup>a</sup>  | 7.8 <sup>b</sup>   | 3.1 <sup>bc</sup>  | 3.1 <sup>bc</sup>  | 2.2 <sup>c</sup>  | 3.3 <sup>bc</sup>  | 1.79 | <0.001  |
| Streptococcaceae *      |                    |                    |                    |                    |                   |                    |      |         |
| <i>Streptococcus</i>    | 2.7 <sup>a</sup>   | 0.01 <sup>b</sup>  | 0.3 <sup>b</sup>   | 0.4 <sup>b</sup>   | 0.7 <sup>b</sup>  | 1.5 <sup>ab</sup>  | 0.64 | 0.003   |
| Erysipelotrichaceae     | 2.01 <sup>ab</sup> | 1.1 <sup>b</sup>   | 1.7 <sup>b</sup>   | 1.8 <sup>ab</sup>  | 1.5 <sup>b</sup>  | 3.2 <sup>a</sup>   | 0.49 | 0.005   |
| Enterococcaceae *       |                    |                    |                    |                    |                   |                    |      |         |
| <i>Enterococcus</i>     | 1.7                | 0.1                | 0.1 <sup>b</sup>   | 0.04               | ND                | 0.02               | -    | -       |
| Clostridiaceae          | 0.7 <sup>c</sup>   | 5.7 <sup>a</sup>   | 4.3 <sup>ab</sup>  | 4.3 <sup>ab</sup>  | 3.1 <sup>b</sup>  | 4.8 <sup>ab</sup>  | 0.87 | <0.001  |
| <i>Clostridium</i>      | 0.7 <sup>b</sup>   | 4.7 <sup>a</sup>   | 3.4 <sup>a</sup>   | 3.3 <sup>ab</sup>  | 2.3 <sup>b</sup>  | 4.4 <sup>a</sup>   | 0.73 | <0.001  |
| Catabacteriaceae *      |                    |                    |                    |                    |                   |                    |      |         |
| <i>Catabacter</i>       | ND                 | ND                 | 0.4                | 0.6                | 0.4               | 1.2                | -    | -       |
| Oscillospiraceae        | ND                 | ND                 | 0.8                | 0.4                | 0.2               | 1.0                | -    | -       |
| Peptostreptococcaceae   | ND                 | 2.1                | 0.6                | 0.8                | 0.7               | 0.3                | 0.43 | 0.001   |
| <b>Proteobacteria</b>   | 6.3 <sup>a</sup>   | 0.6 <sup>b</sup>   | 0.2 <sup>b</sup>   | 0.7 <sup>b</sup>   | 0.2 <sup>b</sup>  | 0.2 <sup>b</sup>   | 0.89 | <0.001  |
| Enterobacteriaceae      | 6.2 <sup>a</sup>   | 0.5 <sup>b</sup>   | 0.2 <sup>b</sup>   | 0.6 <sup>b</sup>   | 0.2 <sup>b</sup>  | 0.2 <sup>b</sup>   | 0.93 | <0.001  |
| <i>Escherichia</i>      | 4.9 <sup>a</sup>   | 0.5 <sup>b</sup>   | 0.2 <sup>b</sup>   | 0.6 <sup>b</sup>   | 0.2 <sup>b</sup>  | 0.2 <sup>b</sup>   | 0.81 | <0.001  |
| <b>Bacteroidetes</b> *  |                    |                    |                    |                    |                   |                    |      |         |
| Rikenellaceae           |                    |                    |                    |                    |                   |                    |      |         |
| <i>Alistipes</i>        | 0.1 <sup>c</sup>   | 1.8 <sup>c</sup>   | 23.6 <sup>b</sup>  | 21.2 <sup>b</sup>  | 35.7 <sup>a</sup> | 20.2 <sup>b</sup>  | 5.04 | <0.001  |
| <b>Tenericutes</b>      | 0.1 <sup>b</sup>   | 1.1 <sup>b</sup>   | 4.3 <sup>ab</sup>  | 7.7 <sup>a</sup>   | 6.3 <sup>a</sup>  | 3.7 <sup>ab</sup>  | 1.8  | 0.002   |

<sup>1</sup>Bacteria with a relative abundance of more than 1% in one the six sampling days are presented in the table

\* 99-100% sequences belong to their corresponding family and/or genus

<sup>a-c</sup>LSMeans within the same row with different superscripts differ significantly ( $P \leq 0.05$ )

ND = not detectable
